# Supplementary material for: Exceptional electrochemical performance of porous TiO2–carbon nanofibers for lithium ion battery anodes
Source: Royal Society of Chemistry journal article supplement (doi:10.1039/c3ta14646d), 2014-01-01
Supplement: c3ta14646d.pdf [file c3ta14646d.pdf]

Supporting Information

## Exceptional Electrochemical Performance of Porous TiO<sub>2</sub>-Carbon Nanofibers for a Lithium Ion Battery Anode

Xiaoyan Li,<sup>a</sup> Yuming Chen,<sup>a</sup> Limin Zhou,<sup>\*a</sup> Yiu-Wing Mai<sup>ab</sup> and Haitao Huang<sup>c</sup>

<sup>a</sup>Department of Mechanical Engineering, The Hong Kong Polytechnic University, Hong Kong, China

<sup>b</sup>Centre for Advanced Materials Technology (CAMT), School of Aerospace, Mechanical and Mechatronics Engineering J07, The University of Sydney, NSW 2006, Australia

<sup>c</sup>Department of Applied Physics, The Hong Kong Polytechnic University, Hong Kong, China

Email: mmlmzhou@polyu.edu.hk

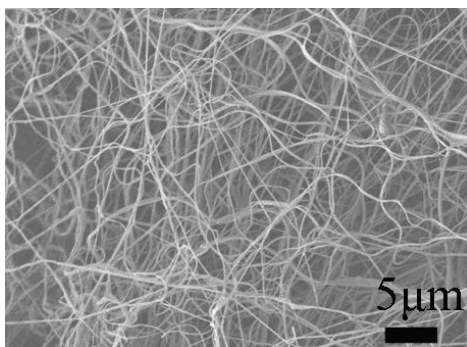

Fig. S1 (a) SEM image of the ODPTCNs.

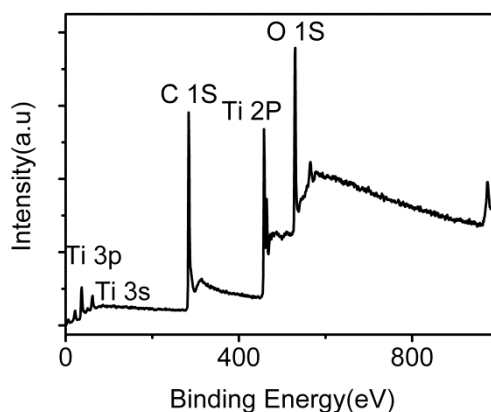

Fig. S2 (a) XPS fully scanned spectra of the ODPTCNs.

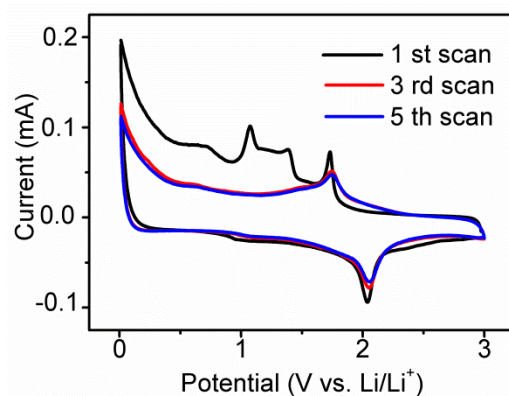

**Fig.S3** Cycle voltammograms of the ODPTCNs in LiPF<sub>6</sub> with Li as counter and reference electrode at a scan rate of 0.1 mV/s.

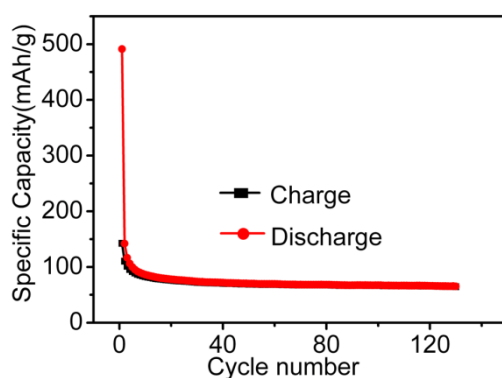

**Fig.S4** Cycling performance of TiO<sub>2</sub> nanofibers at a current density of 100 mA g<sup>-1</sup>.

**Table S1** Comparison of capacities for various TiO<sub>2</sub>-based anode electrodes

| Material                   | Current density        | Potential range | Capacity [mA h g <sup>-1</sup> ] | Ref.       |
|----------------------------|------------------------|-----------------|----------------------------------|------------|
| TiO <sub>2</sub> -carbon   | 100 mA g <sup>-1</sup> | 0-3V            | 680, 250 cycles                  | This study |
| TiO <sub>2</sub> -RGO      | 100 mA g <sup>-1</sup> | 0-3V            | 200,100 cycles                   | 1          |
| TiO <sub>2</sub> -carbon   | 30 mA g <sup>-1</sup>  | 0-3V            | 420, 50 cycles                   | 2          |
| TiO <sub>2</sub> -graphene | 150 mA g <sup>-1</sup> | 0-3V            | 430,100 cycles                   | 3          |
| TiO <sub>2</sub> -carbon   | 100 mA g <sup>-1</sup> | 1-3V            | 371, 1 cycle                     | This study |
| TiO <sub>2</sub> -graphene | 33 mA g <sup>-1</sup>  | 1-3V            | 185, 1 cycle                     | 4          |
| TiO <sub>2</sub> -CNT      | 50 mA g <sup>-1</sup>  | 1-3V            | 212, 1 cycle                     | 5          |
| TiO <sub>2</sub> -carbon   | 170 mA g <sup>-1</sup> | 1-3V            | 210, 1 cycle                     | 6          |

## Reference

1. J. X. Qiu, P. Zhang, M. Ling, S. Li, P. Liu, H. J. Zhao and S. Q. Zhang. *ACS Appl. Mater. Interfaces* 2012, **4**, 3636.
2. C. Q. Feng, J. Tang, C. F. Zhang and R. Zeng. *Nanosci. Nanotechnol. Lett.*, 2012, **4**, 430.
3. H. Huang, J. W. Fang, Y. Xia, X. Y. Tao, Y. P. Gan, J. Du, W. J. Zhu and W. K. Zhang. *J. Mater. Chem. A*, 2013, **1**, 2495.
4. X. Zhang, P. S. Kumar, V. Aravindan, H. H. Liu, J. Sundaramurthy, S. G. Mhaisalkar, H. M. Duong, S. Ramakrishna and S. Madhavi, *J. Phys. Chem. C*, 2012, **116**, 14780.
5. Y. G. Guo, F. F. Cao, S. F. Zheng, X. L. Wu, L. Y. Jiang, R. R. Bi, L. J. Wan and J. Maier, *Chem. Mater.*, 2010, **22**, 1908.
6. H. W. Bai, Z. Y. Liu and D. D. Sun, *J. Mater. Chem.*, 2012, **22**, 24552-24557.
